1 **A qualitative study exploring the diagnostic and treatment journeys of children and**  
2 **young people with gastroduodenal disorders of gut-brain interaction, their**  
3 **families, and the clinicians who care for them**

4  
5

6 Authors and Institutions

7  
8

9 Gayl Humphrey<sup>1\*</sup>

10

11 Mikaela Law<sup>1,3</sup>

12

13 Celia Keane<sup>1</sup>

14

15 Christopher N Andrews<sup>2</sup>

16

17 Armen Gharibans<sup>1,3</sup>

18

19 Greg O'Grady<sup>1,3</sup>

20

21 <sup>1</sup> Department of Surgery, The University of Auckland, New Zealand

22 <sup>2</sup> Division of Gastroenterology, Cumming School of Medicine, University of Calgary, Canada

23 <sup>3</sup> Alimetry Ltd, Auckland, New Zealand

24

25 \*Corresponding Author

26 Gayl Humphrey

27 Department of Surgery

28 University of Auckland

29 Auckland, New Zealand

30 [g.humphrey@auckland.ac.nz](mailto:g.humphrey@auckland.ac.nz)

31 -64 021 110 0901

32

33

34 **Acknowledgements and Funding**

35 The authors would like to thank the children, their families and the clinicians who took part in

36 this research. This study was supported by the Health Research Council of New Zealand.

37

38

38 **Conflicts of Interest**

39

39 GOG and AG hold grants and intellectual property in the field of gastrointestinal

40 electrophysiology. They are Directors in Alimetry Ltd. NZ. GOG is a Director in The Insides

41 Company, and CK is an advisor for The Insides Company. ML, CNA and AG are employees or

42 shareholders of Alimetry Ltd, NZ. The remaining authors have no conflicts to declare.

43

43 **NOTE: This preprint reports new research that has not been certified by peer review and should not be used to guide clinical practice.**

44 **Author Contributions**

45 GH, CK, and GOG were involved in the conception and design of the study. GH undertook the  
46 data collection and analyses and wrote the first draft. All authors contributed to critical  
47 revisions and final approval of the manuscript.

48

49 **Data Availability**

50 The data supporting the findings in this manuscript are available through the corresponding  
51 author (GH) upon reasonable request and ethical approval.

52 **Abstract**

53

54 **Background**

55 Gastroduodenal disorders of gut-brain interaction (DGBI) are prevalent in the paediatric  
56 population. Diagnostic pathways and subsequent treatment management approaches for  
57 children and young people can be highly variable, leading to diverse patient and clinical  
58 experiences. This study explores the DGBI diagnostic experiences of children and their  
59 families and the perspectives of clinicians in the New Zealand context.

60 **Methods**

61 Semi-structured interviews were conducted with 12 children with gastroduodenal DGBIs and  
62 their families and clinicians who care for children with DGBIs. Interviews were recorded,  
63 transcribed, and narratively analysed.

64 **Results**

65 Five children and family themes emerged: 1) how it all started, 2) the impacts symptoms had  
66 on child and family life, 3) their experiences with testing and investigations, 4) the perceptions  
67 and impacts of challenging clinical relationships, and 5) the uncertainty of trial and error  
68 treatments. Clinicians also identified five key themes: 1) navigating the complexity of  
69 presenting symptomology, 2) the challenging diagnostic investigation decision-making process,  
70 3) navigating management and treatment approaches, 4) a lack of standardised clinical  
71 pathways, and 5) establishing therapeutic relationships with patients and families.

72 **Conclusion**

73 Children, their families, and clinicians confirmed the clinical complexity of DGBIs, the  
74 challenges of diagnosis and management, and the stress this places on therapeutic  
75 relationships. Clearer diagnostic pathways and new investigations that could provide  
76 improved identification and discrimination of DGBIs are needed to minimise the treat-test  
77 repeat cycle of care and improve health outcomes.

78

## 79 BACKGROUND

80 Gastroduodenal symptoms such as nausea, vomiting, upper abdominal pain, bloating, early  
81 satiety, and reflux are commonly reported symptoms experienced by children with  
82 gastroduodenal disorders of gut-brain interaction (DGBIs). These symptoms can lead to  
83 significant discomfort and distress for children<sup>1-5</sup>, including poor health-related quality of life<sup>6,7</sup>  
84 sleep<sup>8,9</sup>, physical activity, school, and social activities<sup>10,11</sup>, and higher anxiety and depression.<sup>12</sup>  
85 Additionally, these poorer outcomes have been found to persist into adulthood.<sup>13</sup>

86 Families with children with a DGBI often report poorer family functioning and higher stress  
87 levels than families with healthy children.<sup>14,15</sup> Furthermore, the financial burden can also be  
88 significant for the families themselves<sup>16</sup> and the health sector. Enhancing diagnostic  
89 capabilities for DGBIs could contribute to increased patient satisfaction, better clinical  
90 outcomes, and a more comprehensive understanding of these often complex and multifaceted  
91 disorders.

92 Until the underlying pathophysiological mechanisms are better understood and validated  
93 biomarkers are established, the Rome Pediatric DGBI classification framework remains a well-  
94 established tool clinicians can utilise to make a positive diagnosis with minimal  
95 investigations.<sup>17</sup> In addition to the Rome framework, various international Paediatric Societies  
96 have produced consensus-based condition-specific DGBI recommendations that reflect their  
97 healthcare jurisdictions and available diagnostic, management, and treatment options.  
98 However, adherence and clinical utility remain variable despite these guidelines and  
99 recommendations.<sup>18,19</sup>

100 It is clear from the international evidence that the diagnostic pathways and subsequent  
101 treatment management approaches for children and young people with gastroduodenal DGBIs  
102 can be highly variable.<sup>14,20,21</sup> Research in New Zealand has reported a similar prevalence of  
103 DGBIs, including gastroduodenal DGBIs in children aged 4-18 years<sup>12</sup>, as global epidemiological

104 studies.<sup>22, 23</sup> However, no studies have explored the diagnostic and treatment experiences of  
105 children with gastroduodenal DGBIs in New Zealand. Therefore, this study aims to gather the  
106 diagnosis and treatment journeys and experiences of New Zealand children, young people, and  
107 their families, as well as the experiences and perspectives of the health professionals who  
108 diagnose and care for children with gastroduodenal DGBIs.

109

## 110 **METHODS**

111 A prospective qualitative study with a snowball recruitment methodology was adopted to  
112 gather rich and contextual data on the participants' experiences.

113 This study received ethical approval from the Auckland Health Research Ethics Committee,  
114 New Zealand (AH22600) and is reported per the Standards for Reporting Qualitative Research  
115 (SRQR) (Table 4).<sup>24</sup>

### 116 **Participants**

117 Children and young people (hereafter called children) and their families were recruited from  
118 clinical networks, social media posts, and online support groups. Children were included if  
119 they were aged between 5-18 years, lived in New Zealand, spoke English, and were diagnosed  
120 with a gastroduodenal DGBI. Gastroduodenal DGBIs were determined by each child meeting  
121 the criteria of at least one Rome IV Pediatric Functional Gastrointestinal Disorders Disorders of  
122 Gut-Brain Interaction categories - H1. Functional Nausea and Vomiting Disorders, and H2.  
123 Functional Abdominal Pain Disorders, excluding H2c: IBS.<sup>25</sup> A "family" included at least one  
124 legal guardian or parent of a child participant aged 5-16 years. However, it could include the  
125 whole family unit, including all legal guardians or parents, other significant family members,  
126 and siblings. Participants aged 17 or 18 could consent to participate in the interview  
127 independently if they preferred.

128 Health professionals such as family practitioners, paediatricians, paediatric  
129 gastroenterologists, clinical nurse specialists, and psychologists who diagnose and care for

130 children with gastroduodenal DGBIs as part of their clinical roles were recruited through  
131 networks. No participating clinician was the current healthcare provider of any child  
132 participants, and the researchers had no prior relationship with any participants.

133 All participants took part in an online semi-structured virtual interview. Written informed  
134 consent was obtained from each participant. Separate semi-structured interview schedules  
135 were developed to guide each interview and enable flexibility in exploring unexpected issues  
136 that emerged during the interviews. The interviews with children and families explored  
137 narratives and experiences of the onset of symptoms, self-help seeking solutions, when health  
138 professional help was sought and why, and their experience of the health care journey. The  
139 interviews with the clinicians focused on exploring their experiences and challenges of  
140 diagnosing, managing treatment, and caring for children with DGBIs. Interviews were audio  
141 recorded, transcribed, de-identified, and coded using NVivo. Where names are used in quotes,  
142 they are fabricated to preserve participant confidentiality. Data saturation was reached with the  
143 12<sup>th</sup> child and family group and six clinicians.

144 There was no relationship between the researchers undertaking the research or analysing the  
145 data and the participants.

## 146 **ANALYSIS**

147 A narrative analysis was followed.<sup>26</sup> Each interview was read several times, and the text was  
148 parsed into meaningful items according to the purpose of the study. Each text item was  
149 categorised and coded to enable differences and similarities to be explored and to group into  
150 main themes.

151

152

153

154 **RESULTS**

155 **Demographics**

156 Twelve children were interviewed, with demographics provided in Table 1. Nine were  
 157 interviewed with their mother, one interview included both mother and father, and two children  
 158 were interviewed independently (both female). All children met the Rome IV criteria for a  
 159 gastroduodenal DGBI, with four having overlapping symptoms with functional constipation (FC)  
 160 (Table 1). However, they all reported that their upper gastrointestinal symptoms were the most  
 161 bothersome.

162 **Table 1.** Demographics of participant children

| Characteristics                           |                  | Children<br>(n=12) |
|-------------------------------------------|------------------|--------------------|
| <b>Age (years), median (range)</b>        |                  | 15.5 (12-18)       |
| <b>Female†, n (%)</b>                     |                  | 7 (58%)            |
| <b>Ethnicity</b>                          | NZ European      | 8                  |
|                                           | Pasifika         | 1                  |
|                                           | Indian           | 1                  |
|                                           | South-East Asian | 1                  |
|                                           | European         | 1                  |
| <b>Rome IV</b>                            | FD alone         | 4                  |
|                                           | Rumination       | 1                  |
|                                           | FN & FV          | 2                  |
|                                           | FAP-NOS          | 1                  |
|                                           | FD & FC          | 2                  |
|                                           | FN, FV & FC      | 1                  |
|                                           | FAP-NOS & FC     | 1                  |
| <b>Children Interviewed with Parent</b>   |                  | 10                 |
| <b>Children Interviewed Independently</b> |                  | 2                  |

179 † Participants self-identified as male or female with no participant identified as  
 180 gender diverse; FD= Functional Dyspepsia; FN= Functional Nausea; FV=  
 181 Functional Vomiting; FAP-NOS= Functional Abdominal Pain not otherwise  
 182 specified; FC= Functional Constipation

183  
 184 Six clinicians were interviewed (professions were general practitioner (GP), paediatrician,  
 185 psychologist, nurse specialist, and paediatric gastroenterologist). The clinicians were from

186 different regions and health settings across New Zealand. All worked full- or part-time in the  
187 public health sector.

188 The children and family interviews lasted between 45-110 minutes, and the clinician interviews  
189 lasted between 40-65 minutes.

## 190 **CHILDREN AND FAMILY THEMES**

191 Five themes with a number of sub-themes (bolded in the text) were identified from the  
192 interviews with the children and their families. Table 2 presents the hierarchy of themes and  
193 example quotes from participants.

### 194 ***Theme 1. How it all started***

195 The first theme explored the reflections children and their families had on how it all started as a  
196 way to contextualise where they are now in their journey. Two main starting points emerged,  
197 with the two groups having differential experiences with care. Firstly, an **acute** start was  
198 described, where the child had an unexpected episode of abdominal pain or vomiting that was  
199 unrelenting and resulted in families seeking medical care at the emergency department (ED) or  
200 urgent care centre. The second was the **slow burner** start, where, over time, there was an  
201 accumulation of events, behaviours, and experiences that signalled something was wrong and  
202 thus sought medical advice, primarily from their GP. Participants were equally distributed  
203 between these two starting points.

204 All participants recalled a comprehensive physical examination and laboratory tests during  
205 their first interaction with medical care. For the acute group, two children had abdominal X-  
206 rays, and one had an abdominal ultrasound. In all cases, participants reported that the  
207 investigation results were normal. This elicited a sense of relief for the acute group. In  
208 contrast, the slow burner group reported feeling somewhat unsatisfied with the lack of  
209 conclusive results to explain their child's symptoms.



210 After the initial medical care visit, the acute group commented that they were given little advice  
211 on managing the symptoms, including seeing their GP if symptoms persist or worsen. In  
212 contrast, the slow burner group reported receiving prescriptions for take-as-needed anti-  
213 emetics (n=2) and laxatives (n=3), with one participant receiving analgesia, anti-emetics, and  
214 laxatives. All reported being provided dietary advice but recalled that this was not structured  
215 guidance and was "*pretty vague*".

## 216 **Theme 2. Impact on life**

217 The third theme explored the impact of the symptoms on their lives. The parent participants  
218 frequently mentioned the impact of symptoms on **school attendance and learning**, with  
219 almost half of the children reporting being home-schooled or having periods of home-schooling  
220 due to their symptomatology. Their symptoms also resulted in negative **psychological**  
221 **impacts** for the child and family, including anxiety and depression. **Relationships** were also  
222 negatively impacted; for example, the children experienced the loss of school friendships.  
223 Parents also mentioned the **stress** placed on the internal family dynamics, and two parents  
224 also mentioned the **financial impact**. This was particularly highlighted by participants who  
225 had to home-school their children.

226 All the children reported a shift in their relationship with food since the onset of their symptoms,  
227 including **food avoidance, restriction, or fear**.

228 It was evident that parents and the children employed various **coping strategies and**  
229 **initiatives** to lessen the impact of the symptoms on their lives. These coping strategies varied  
230 widely; for example, one family home-schooled their child, and they talked about breaking up  
231 the day with lots of breaks to accommodate times when symptoms were "*particularly bad*".  
232 Another spoke about "*deep breathing and not focusing on the symptoms*", whereas another  
233 said they "*went to bed until they felt better*". These varying strategies reflected the diverse family  
234 dynamics and the specific symptoms experienced by the children.

235 **Theme 3. Investigations, the Normal Outcome, and the Diagnosis**

236 The third theme highlighted the clinical care pathway experienced, with differential experiences  
237 noted across participants. Only two children were referred to specialist services at their first  
238 medical presentation. Three participants reported that the outcome of the first referral was  
239 that they *did not meet the threshold for a specialist appointment* and that care remained with  
240 the GP. One family decided to go privately. **Access to a specialist service** was reported to  
241 take 3-12 months and 4-5 visits to the GP before being referred.

242 Once children were under specialist care, more invasive tests such as endoscopies (n=8),  
243 radiological tests (CT scans, n=2), and nuclear tests (scintigraphy, n=3) were undertaken. No  
244 one reported a clinically significant outcome from the range of tests, and the continued  
245 surprise at the **normal test result outcomes** was a common theme. The lack of correlation  
246 between the intensity of symptoms and a tangible investigation outcome was  
247 incomprehensible for some families. For others, the normal results were viewed as *a relief*.

248 Most of the participants described current diagnostic tools and processes as limited. They  
249 remarked that the current tools did not provide enough insights and that there was a need for  
250 **new diagnostic tools** that could offer more precise and efficient methods to identify their  
251 children's disorders. This would facilitate earlier and more accurate diagnoses that could  
252 enhance the clinical experience by alleviating the emotional and physical burden of ongoing  
253 symptoms. Plus, by providing a clearer diagnosis, the doctors can tailor treatment plans from  
254 the outset, thus reducing the treat- test- treat- repeat cycle.

255 Despite numerous interactions with primary care, many participants reported that the term  
256 "functional" was not introduced as a potential **diagnosis** for their child's symptoms until they  
257 accessed specialist services. Some participants recalled that the term "functional" was **not**  
258 well-explained, leaving them feeling that their concerns were not taken seriously. These  
259 participants were more inclined to seek out additional medical opinions.

260 **Theme 4. Clinical Relationships**

261 The fourth theme explored the participants' perceptions of their relationships with healthcare  
262 providers. A few participants' perceptions of the early negative encounters with the health  
263 sector profoundly influenced subsequent interactions, often setting a challenging and  
264 combative tone with the clinical relationship. Some participants highlighted that they had to  
265 persistently advocate for their child's condition to be taken seriously or to push for further  
266 testing, which contributed to higher levels of dissatisfaction with the care provided and feelings  
267 of **disempowerment**.

268 In contrast, participants who experienced a positive relationship and open communication with  
269 their clinical team felt supported and regarded themselves as active partners in the decision-  
270 making process. One participant recounted how her clinical team offered support by  
271 attentively listening to and valuing her opinions and actively encouraging her to monitor her  
272 progress with different treatments. This approach gave her a **greater sense of control** over her  
273 symptoms and significantly boosted her confidence in managing them.

274 **Theme 5. Trial and Error Treatment Experience**

275 The final theme explored participants' treatment and management experiences, who often  
276 described a **trial-and-error approach** to their care. They recognized that, due to the absence of  
277 an identifiable physical problem, treatment strategies focused on experimenting with different  
278 dietary modifications and medications to alleviate symptoms. Participants expressed  
279 frustration with how time-consuming and challenging this approach could be, especially when  
280 they were eager for immediate symptom relief.

281 Nevertheless, most of the participants also remarked that they understood that this method  
282 aimed to find the right treatment balance without excessive reliance on medications.

283 However, the trial-and-error approach also had its drawbacks. One teenage participant likened  
284 her experience to being a parcel in a children's party game of **pass-the-parcel**, illustrating how  
285 she felt shuffled between clinicians, given different explanations and medicines, without clear  
286 communication concerning what to expect. This analogy underscored the difficulties patients  
287 faced in navigating the healthcare system and the need for a more cohesive and coordinated  
288 approach to care.

289 Participants frequently highlighted the lack of timely access to support services such as  
290 psychologists or dietitians, which exacerbated the challenges they faced in managing their  
291 symptoms. The lack of access often left families feeling unsupported and overwhelmed as they  
292 tried to navigate complex treatment regimens on their own. This contributed to feelings of  
293 frustration and helplessness and, for some, also eroded their relationship with the clinicians  
294 caring for them.

## 295 **CLINICIAN THEMES**

296 Five key themes, with a number of sub-themes (bolded in the text), emerged from the clinician  
297 interviews. Table 3 presents the hierarchy of clinician themes, with example quotations.

### 298 **Theme 1. Navigating Complexity and Uncertainty**

299 The first clinician theme explored how managing DGBIs involves navigating **complex**  
300 **symptoms** and an incomplete understanding of underlying mechanisms. As clinicians, this  
301 meant these symptoms required a nuanced approach that appreciates the diversity of  
302 symptoms and their impact on patients' lives.

303 Depending on where they were in the clinical pathway (primary care to the specialist) and their  
304 confidence to make a functional diagnosis, clinicians responded differently to the lack of a  
305 clear aetiology. The Rome criteria were well known but were reported as difficult to apply in  
306 practice (I would add why here). Different international and local guidelines were also  
307 mentioned; however, patients presented with a mix of **dominant overlapping symptoms**,

308 which made applying either Rome or the guidelines difficult. As such, there was a tendency to  
309 rely more on **clinical experience** to suit a patient's unique symptomatology and needs.

## 310 **Theme 2. Diagnostic Process**

311 The second theme explored the current diagnostic decisions and processes clinicians  
312 implemented and how these were highly correlated with the complexity and uncertainty of  
313 these symptoms. The current **diagnostic tools were viewed as vague** in their ability to provide  
314 a clear diagnostic outcome in most circumstances, with 'normal' or 'nothing abnormal'  
315 outcomes reported as somewhat dissatisfying.

316 When selecting investigations, the focus was on carefully **balancing thoroughness** and  
317 potential benefits with the necessity of **avoiding unnecessary procedures** with low yields and  
318 minimising the burden of tests. This approach was especially important in fostering a strong  
319 therapeutic relationship, as many patients may have waited over 12 months for a specialist  
320 appointment and were highly anxious about what may be wrong. However, it was also  
321 important to ensure that patients did not end up on an "investigative roundabout", which often  
322 shifted the focus from management and treatment plans to searching for an elusive diagnosis .  
323 Effective and empathetic communication was reported as crucial for streamlining the clinical  
324 care pathway process.

325 Despite the frustration currently experienced, there was optimism for **future diagnostic**  
326 **capabilities** that would provide some certainty to the underlying aetiology of DGBIs, which was  
327 somewhat missing with the current diagnostic investigations. Clinicians remarked that the  
328 current investigations played a role in ensuring there was no potential organic condition,  
329 inflammation, or other co-existing structural issues. However, despite conducting these tests,  
330 they remarked that they were pretty confident that the outcomes for many of these children  
331 would likely be normal. Many highlighted that the new research into the gut microbiome,  
332 metabolomics, and innovations in non-invasive imaging technology held promise for more

333 accurate and earlier identification of the underlying mechanisms of DGBIs. The desired  
334 outcome highlighted was that these new investigations would help direct decisions for those  
335 needing further investigation and also open up new insights into personalised treatments and  
336 ultimately improve the lives of children and their families.

### 337 **Theme 3. Management and Treatment Approaches**

338 The third clinician theme discussed how DGBIs present significant treatment and management  
339 challenges due to their complex and heterogeneous nature. Effective management requires a  
340 comprehensive **biopsychosocial approach**, integrating multiple elements such as lifestyle and  
341 dietary modifications, pharmacological treatments, and psychological therapies. However,  
342 treatment for DGBIs continues to be a matter of **trial and error** for patients because symptoms  
343 vary widely.

344 Clinicians noted how trial-and-error treatment approaches were not unique, with many other  
345 chronic conditions relying on a **personalised approach to** selecting different therapy  
346 combinations to find what combination alleviates the patient's symptoms. However, without a  
347 clear understanding of the mechanisms involved for many DGBIs, the trial and error approach  
348 can lead to a prolonged search for effective treatments, and patients and families often endure  
349 significant emotional distress and frustration during this process.

350 The distress and frustration experienced by families were reported as a common reason some  
351 families sought **multiple opinions** from different medical professionals, which sometimes led  
352 to further delays in care or treatments that are conflicting without realising. Irrespective of the  
353 reasons for treatment delays, participants remarked that delays in confirming a diagnosis were  
354 one of the main reasons for exacerbating or worsening a child's symptoms.

355

356

357 **Theme 4. Standardised Clinical Pathway**

358 The fourth clinician theme highlighted how a clinical pathway offers a **structured approach to**  
359 **management and treatment** that integrates evidence-based practices. Participants  
360 responded that there was no clear standardised pathway to join different healthcare services.  
361 Different regions across New Zealand had different referral pathways from GP to  
362 hospital/specialist care. Differences emerged in the thresholds for sending a referral, criteria at  
363 hospital/specialist services accepting a referral, the internal triaging process at the specialist  
364 clinic (which determines wait times), and the individual clinician variation in their clinical care  
365 approaches.

366 There were also notable variations in **access to multidisciplinary services** like psychologists  
367 or dietitians, which were considered essential to management. In many cases, these services  
368 had limited staff numbers and long wait lists, and in some geographic locations, these services  
369 were unavailable. All participants highlighted these challenges as reasons their patients had  
370 such **variable clinical journeys**.

371 **Theme 5. Therapeutic Relationships**

372 The final theme highlighted that the therapeutic relationship forged between the doctor,  
373 patient, and family was a cornerstone of health care. **Building trust and ensuring robust**  
374 **communication** was paramount, as they enhanced patient/family engagement as partners in  
375 the process, positively impacting the management. Given the often misunderstood and  
376 prolonged nature of these conditions, it was important that patients and their families feel  
377 listened to, validated and supported. Establishing a **positive clinical-patient (family)**  
378 **relationship** was highlighted as crucial in empowering patients. Through this relationship,  
379 valuable knowledge is shared, leading to shared decisions that enable patients to gain the  
380 confidence needed to manage their conditions effectively. This empowerment leads to better  
381 management of their health and, ultimately, an improved quality of life.

382 In contrast, participants highlighted many barriers to establishing and maintaining a positive  
383 therapeutic relationship. Barriers such as parents' desire for a curative outcome, which was  
384 only possible with a 'proper' diagnosis, led to confrontational interactions that were challenging  
385 to work through. The difficulty in explaining DGBIs and the general lack of clarity of the  
386 underlying mechanisms sometimes created parental perceptions that their concerns were not  
387 adequately addressed. Finally, discussing the psychological factors that influence DGBIs,  
388 clinicians reported that, at times, families had **misinterpreted** or **misunderstood** these  
389 conversations as their child's concerns were being overlooked or dismissed. Taking time to  
390 have these interactions is important, but this was not always possible in busy healthcare  
391 settings.

392 Furthermore, access to other services, such as psychological and social support, was '*..non-*  
393 *existent*', '*..limited*' or '*..had long wait times*'. The clinicians reflected that many of the issues  
394 and barriers experienced were a symptom of a lack of a well-staffed multidisciplinary team to  
395 support the diagnostic and treatment pathway. The overarching sentiment from the clinicians  
396 was that children with DGBIs (and their families) were some of the **most clinically challenging**.

## 397 **DISCUSSION**

398 Children, family, and clinician participants acknowledged that diagnosing DGBIs is complex  
399 due to the variability and severity of symptom presentation and the impact on quality of life. For  
400 example, a recurring theme for the children and families was the lengthy and often convoluted  
401 clinical journey to achieve what was, for some, an unsatisfactory diagnosis. While the type,  
402 timing, and frequency of investigations varied, a common outcome was the absence of  
403 abnormal findings. For clinicians, this absence of abnormalities provided the certainty needed  
404 to make a DGBI diagnosis; however, for families, it sometimes resulted in confrontational  
405 interactions and a decline in the therapeutic relationship.



406 The desire for diagnostic certainty was similarly strong between groups; however, there was a  
407 notable incongruence in how clinicians and families understood certainty. While clinicians  
408 often viewed certainty as the ability to rule out serious conditions and, where possible, provide  
409 a probable diagnosis based on symptoms as per Rome criteria<sup>25</sup>, families tended to seek more  
410 definitive answers, often hoping for clear-cut diagnoses with identifiable causes and  
411 straightforward treatment plans. This mismatch in expectations led to frustration and  
412 dissatisfaction and resulted in some families seeking multiple medical opinions. This cycle of  
413 behaviour has been found to lead to delays in treatment initiation, poorer outcomes and higher  
414 healthcare costs.<sup>27,28</sup> These experiences were recounted as contributing to a somewhat  
415 combative clinician-patient/family therapeutic relationship. Similar findings are reported in the  
416 international literature.<sup>29-32</sup>

417 Furthermore, clinicians and families acknowledged the limitations of the investigations  
418 currently available and that new tests are needed that offer more nuanced indicators and  
419 actionable biomarkers. The lack of understanding of aetiopathogenesis can result in similar  
420 symptoms in patients that are not always ameliorated by similar treatments, resulting in a trial-  
421 and-error approach to treatment.<sup>33</sup> For the children and the families, reducing this cycle  
422 through more effective diagnostic technologies would reduce the diagnostic journey, provide  
423 more certainty of the care pathway, and positively impact their children's quality of life. For  
424 clinicians, feeling more confident with the diagnosis and management plan could improve the  
425 clinician-patient relationship. In addition, introducing the term functional or DGBI early in the  
426 diagnostic journey is essential and has been found to help avoid over-investigation.<sup>34</sup>

427 Research reports that communication is an essential skill for clinicians caring for patients with  
428 DGBIs.<sup>35-37</sup> This study's findings illustrate that, at times, clinician-patient/family  
429 communication was difficult and impacted the therapeutic relationships, which, in turn,  
430 caused dissatisfaction with what was perceived as a lack of a care pathway. Other research

431 reflects similar findings and highlights the importance of a positive therapeutic relationship in  
432 that it promotes relational continuity and positively impacts patient health outcomes.<sup>14, 20, 21</sup>

433 Research evidence also highlights the effectiveness of a multidisciplinary team involved in  
434 caring for and managing children (and families) with DGBIs.<sup>38-40</sup> Effectiveness is shown through  
435 clearer care pathways, shorter diagnostic journeys, and early initiation of treatment. The  
436 participants' conversations in this research revealed a distinct lack of a multidisciplinary  
437 approach to care and management due to the limited availability of dieticians and  
438 psychologists and variable access to these services in New Zealand. Improving the availability  
439 and access to multidisciplinary care was highlighted as a crucial area needing remediation.  
440 Such enhancements would ensure patients benefit from a comprehensive approach that  
441 integrates medical, dietary, psychological, and other specialized support, offering a more  
442 holistic and effective management strategy for conditions like DGBIs. This approach supports  
443 better patient outcomes and addresses the diverse needs of patients and their families, thereby  
444 improving overall satisfaction with healthcare delivery.<sup>50</sup>

445 While data saturation was achieved in this study, some limitations are worth noting. Patient  
446 participants were predominantly New Zealand European, with one Pasifika and no Māori  
447 participants [Indigenous population of New Zealand). However, Māori and Pasifika are  
448 represented in the prevalence of DGBIs in a cohort of New Zealand children.<sup>12</sup> As food and  
449 meals in Pasifika and Māori cultures are embedded within many cultural interactions<sup>41</sup>, more  
450 research into the impact of DGBIs and the diagnostic journeys for Māori and Pasifika children  
451 and families is an important area for future research. Additionally, this research did not gather  
452 details of all the investigations, therapies, and healthcare visits or the participants. Reviewing  
453 these details alongside these narratives can help provide a better understanding of the number  
454 of health services contacts and enable the costs of the current clinical care approach to be  
455 calculated.

456 **Conclusion**

457 This study explored the diagnostic and treatment experiences of children with DGBIs and their  
458 families and clinicians who care for patients with DGBIs in a New Zealand setting. The findings  
459 highlighted a significant impact of gastroduodenal symptoms on the quality of life of these  
460 children. Inadequacies in the current diagnostic investigations and the overall vagueness  
461 associated with being given and giving a DGBI diagnosis were highlighted throughout the  
462 interviews. The reliance on a trial-and-error management approach further contributed to  
463 dissatisfaction with the experience among children, their families, and clinicians. While a  
464 multidisciplinary model of care was recommended, introducing new investigations that could  
465 provide actionable biomarkers was highly desirable. If used early in the diagnostic and  
466 management pathway, these tools could support earlier diagnoses, enable personalized  
467 treatment plans, and help identify patients who would most benefit from the current  
468 investigation tools.

469 **Table 2.** Themes and quotes from interviews with Children and their Families

| Children and their Families |                                |                                                                                                                                                                                                                                                                                                                                                                                                                                                                                     |
|-----------------------------|--------------------------------|-------------------------------------------------------------------------------------------------------------------------------------------------------------------------------------------------------------------------------------------------------------------------------------------------------------------------------------------------------------------------------------------------------------------------------------------------------------------------------------|
| Theme                       | Sub-theme                      | Direct Quotes                                                                                                                                                                                                                                                                                                                                                                                                                                                                       |
| 1. How it all started       | Acute presentation             | ...early Sunday he woke up really early in real distress, crying, really complaining that his tummy really hurt. So off to ED [emergency department] we went. They took some bloods and asked about bowels... Poked and prodded and took an x-ray. All normal. That surprised me. But in some ways I thought ok, that's good... So we went home. (P 10)                                                                                                                             |
|                             | Slow burner                    | ...complaining of tummy pain and nausea for a couple of months off and on I was a bit worried that it hadn't gone away. (P 07)                                                                                                                                                                                                                                                                                                                                                      |
| 2. Impact on Life           | School attendance and learning | So many days off school this past year. I am worried that she will give up because she is behind in everything. (P 05)<br><br>I home-school him now, and we manage the ups and downs without a lot of stress. (P 12)                                                                                                                                                                                                                                                                |
|                             | Psychological impacts          | It gets lonely... I want to join in, but I am worried that I will feel awful, so I don't. (P 01)                                                                                                                                                                                                                                                                                                                                                                                    |
|                             | Relationships with friends     | I miss them. They don't really invite me to anything any more... (P 02)<br><br>It is hard sometimes with my friends, they are really supportive but it's hard for them, I think, to know why I don't just eat. (P 06)                                                                                                                                                                                                                                                               |
|                             | Stressful family dynamics      | I know she gets a bit sad at times. Especially when her friends are all getting out and doing things. It is heartbreaking for me. (P 06)<br><br>...can get a bit heated amongst them... we can't do some things ... so he feels he gets no attention... can't do the things he wants to do (P 09)<br><br>I tried to get him to eat more when we all sit down, you know, for dinner, but it ends up being disastrous, so lots of options and no pressure seems to be working. (P 04) |
|                             | Financial impact               | It takes a bit of a hit, income-wise... I stopped work, but I needed to, so I could help home-school... (P 05)                                                                                                                                                                                                                                                                                                                                                                      |
|                             | Avoiding or restricting food   | Food is a nightmare. I used to love it and loved all sorts of flavours. Now, I feel it is a bit, umm, you know, will I be ok eating this or not? (P 02)                                                                                                                                                                                                                                                                                                                             |

|                                                    |                               |                                                                                                                                                                                                                                                                                                                                                                                                                                                                                                                                                                                    |
|----------------------------------------------------|-------------------------------|------------------------------------------------------------------------------------------------------------------------------------------------------------------------------------------------------------------------------------------------------------------------------------------------------------------------------------------------------------------------------------------------------------------------------------------------------------------------------------------------------------------------------------------------------------------------------------|
|                                                    | Coping strategies/initiatives | We break up the day... short intensity... then rest... it works (P 05)<br>I stop and focus and do this deep breathing (P 01)                                                                                                                                                                                                                                                                                                                                                                                                                                                       |
| 3. Investigations, Normal outcome, and a Diagnosis | Access to Specialist servoces | We have been to the GP 3-4 times over the past 6-12 months. Apart from blood and poo tests at the beginning, which were normal, he hasn't done any more tests. Yet nothing has improved... (P 08)<br><br>... we just don't meet the criteria to see a specialist. (P 03)                                                                                                                                                                                                                                                                                                           |
|                                                    | Normal investigation outcomes | The first time at ED [emergency department]...we had a few tests, x-rays, ultrasound and blood. All normal ... a relief really...(P 07)<br><br>Being told the tests results, all of them, were all normal, just surprised me.... Deep down I thought that they must be wrong. (P 09)                                                                                                                                                                                                                                                                                               |
|                                                    | New diagnostic tools          | ... been told that the current tests are not going to tell us anything...you know, they will all be normal... be nice to have something that will tell us what is wrong ... (P 08)                                                                                                                                                                                                                                                                                                                                                                                                 |
|                                                    | Confirming a DGBI diagnosis   | It must have been a year after all this started that we first heard the term functional disorders. She has this dyspepsia diagnosis... (P 05)<br><br>Hearing about these gut-brain disorders... functional nausea...first made me think they thought itwas all in her head. I was ready to fight for her, I mean she was really unwell... I have done a lot of reading about these now... so we are functional nausea and vomiting disorder ... [laugh] it just doesn't feel like a diagnosis... (P 03)                                                                            |
| 4. Clinical Relationships                          | Disempowered                  | ... those subtle interactions ... like they don't believe it is real... that <b>disempower</b> me. (P 04)                                                                                                                                                                                                                                                                                                                                                                                                                                                                          |
|                                                    | Greater sense of control      | It took a while, but I now have a really great relationship with the docs. They really listened to me. It made me feel that I can manage this stuff. (P 01)                                                                                                                                                                                                                                                                                                                                                                                                                        |
| 5. Trial and Error Treatment                       | Trial and error               | We've been given diets, medicines, diets and medicines, plus we have done our own stuff ... acupuncture, prebiotics, probiotics. Some seem to work for a bit, then stop. It makes her life a bit stressful. I know she thinks, how long will this work until it doesn't? Then back to the hospital for the next round... (P 09)<br><br>We have laughed a few times about the medicine lotto. Will we win this time or will it be "not a winning medicine" [laughter]. (P 02)<br><br>...feel it is all a big experiment. No one really knows what to do or what will work. (Fam 07) |

|  |                 |                                                                                                              |
|--|-----------------|--------------------------------------------------------------------------------------------------------------|
|  | Pass the parcel | I was sort of passed out of the GI services and on to psychological people and to GP then back again. (P 01) |
|--|-----------------|--------------------------------------------------------------------------------------------------------------|

470

471 **Table 3.** Themes and quotes from interviews with clinicians who care for children with DGBIs as part of  
472 their clinical role

| Clinicians                               |                                                |                                                                                                                                                                                                                                                                                                                                                                                                                                                                                                                                                  |
|------------------------------------------|------------------------------------------------|--------------------------------------------------------------------------------------------------------------------------------------------------------------------------------------------------------------------------------------------------------------------------------------------------------------------------------------------------------------------------------------------------------------------------------------------------------------------------------------------------------------------------------------------------|
| Theme                                    | Sub-theme                                      | Quotes                                                                                                                                                                                                                                                                                                                                                                                                                                                                                                                                           |
| 1. Navigating Complexity and Uncertainty | Complex                                        | At primary care it can be a bit of a challenge .....initial visits, everything is normal yet vague and overlapping. (GP01)<br><br>Often a real mix of symptoms...it can be a challenge to tease them out.. (G01)                                                                                                                                                                                                                                                                                                                                 |
|                                          | Overlapping symptoms                           | ... a deterioration or worrying changes such as some weight loss. ...I am trying to understand their symptoms and the context they live in, ....It takes a bit of time to untangle what is going on and where to go from there. (PD 01)                                                                                                                                                                                                                                                                                                          |
|                                          | Clinical Experience                            | ... there is diagnostic uncertainty, and ...fear that something might be missed ... I probably err on doing tests like an endoscopy or nuclear medicine investigation, depending on the presenting symptoms and impacts, even though I am not expecting anything to be found. (G01)<br><br>Some of our tests can be a bit of a blunt instrument in terms of identifying what the underlying causes may be. I try not to offer these ... I guide the family and patient carefully through my decisions. (G02)                                     |
| 2. Diagnostic Process                    | Vagueness of investigations                    | I feel that the more tests you do... eventually you're going to find some little change that may be abnormal, and then the question is, what do you do about it, and is there treatment for that different than what you're currently doing? (G02)                                                                                                                                                                                                                                                                                               |
|                                          | Balancing thoroughness with clinical knowledge | Sometimes families return and return .... you certainly don't want to miss anything, and it's that sort of balance, right? (G01)<br><br>Sometimes, we get referrals from the ED, ...the clinician has done a good medical evaluation and laboratory assessments and identified nothing; the families see us and are looking for something to explain the symptoms ... it is a matter of balancing doing more tests depending on the clinical picture and my experience, leading me to consider the probable normal outcome. Its tricky... (PD01) |

|                                               |                                                                     |                                                                                                                                                                                                                                                                                                                                                                                                                                                                                                   |
|-----------------------------------------------|---------------------------------------------------------------------|---------------------------------------------------------------------------------------------------------------------------------------------------------------------------------------------------------------------------------------------------------------------------------------------------------------------------------------------------------------------------------------------------------------------------------------------------------------------------------------------------|
|                                               | Avoiding unnecessary procedures                                     | The key driver for not choosing to go down an intensive investigation process, especially when there is a real lack of red flags. <b>(G02)</b><br><br>... tests like emptying or endoscopies are not simple procedures ... they shouldn't be used lightly <b>(G01)</b>                                                                                                                                                                                                                            |
|                                               | Future diagnostic capabilities                                      | Learning more about the underlying mechanisms is key to improving things for these conditions. <b>(G01)</b><br><br>There is some exciting new research emerging. I hope it will lead to a better understanding. <b>(G02)</b>                                                                                                                                                                                                                                                                      |
| <b>3. Management and Treatment Approaches</b> | Integrating biopsychosocial approaches into what we do              | Streamlining and integrating all the elements into the process would be the ideal. This would help with our conversations with patients and their family... it would help set clear expectations for them and us regarding what the process will be and why. <b>(NS01)</b><br><br>We work together across disciplines through our MDT [multidisciplinary team] meetings... these are mostly for the kids who are really complex... access to these other services can be limited ... <b>(G01)</b> |
|                                               | Trial and error/<br><br>Prolonged search for effective treatment    | ... when we suspect functional disorders like dyspepsia, there are different responses. ... So we try one therapy, wait to see how they respond, then reassess... It can be a bit of a process. <b>(G02)</b><br><br>...I am sure patients may feel like we are just guessing ... but I don't want to over-treat... <b>(G01)</b>                                                                                                                                                                   |
|                                               | Personalising the approach with patients and families               | ... set clear expectations about what the steps for them might be .... and why. The 'why' is so important. Every kid and family are different, what's important for one may not be for another... <b>(NS01)</b>                                                                                                                                                                                                                                                                                   |
|                                               | Responding to patients (families) who have sought multiple opinions | ...it takes a bit of time to get to know the family and unravel what they want... this can mean some delays in what I think the treatment might be. <b>(G01)</b><br><br>... if the family scatter guns out, asking for other opinions. Then, every time we meet, it becomes a bit of a headache. <b>(G02)</b>                                                                                                                                                                                     |
| <b>4. Standardised Clinical Pathway</b>       | Structured approach to management and treatment                     | ... after the medical or GI team has ruled out biological pathology, but the symptoms are severe ,and maybe coping strategies are poor, I get involved to provide psychological support strategies. <b>(P01)</b>                                                                                                                                                                                                                                                                                  |



|                                  |                                                                                     |                                                                                                                                                                                                                                                                                                                                                                                      |
|----------------------------------|-------------------------------------------------------------------------------------|--------------------------------------------------------------------------------------------------------------------------------------------------------------------------------------------------------------------------------------------------------------------------------------------------------------------------------------------------------------------------------------|
|                                  |                                                                                     | We probably all do things slightly differently...mostly because of differences around the country. <b>(G02)</b>                                                                                                                                                                                                                                                                      |
|                                  | Access to multidisciplinary team meetings                                           | We do work together across disciplines...using the MDT (multidisciplinary team) meetings is very effective, but we have limited resources ... so access is often for those at the very severe end. <b>(NS01)</b><br><br>We are pretty lucky here, we have a psychologist and the pain service is based here... this is not the case everywhere. <b>(G01)</b>                         |
|                                  | Variable care journeys                                                              | Unsurprising, different places have different services... I know that other places may take a referral whereas, if I sent it here, it would probably not be accepted... <b>(G01)</b><br><br>... these kids don't fit the multi-comorbidity group ... with our limited resources, we can't easily draw in other services. <b>(PD01)</b>                                               |
| <b>Therapeutic Relationships</b> | Building Trust and ensuring robust communication                                    | Sometimes, the time it has taken a child and family to get to us as specialists... might have been 12 months or more.. there's a lack of acceptance that we can't find anything... critical to take time to listen. <b>(G02)</b><br><br>Depending on the conversation with the family about the referral to me, the meeting can go really well or be a bit confronting. <b>(P01)</b> |
|                                  | Developing a positive clinical patient relationships/<br>Avoiding misinterpretation | ... having a good relationship can influence treatment outcomes... <b>(NS01)</b><br><br>... [family] can challenge every decision ... It's the kids in the middle that can sort of get lost, and this delays them starting a treatment plan. Sometimes, it can delay things by a few months. <b>(G02)</b>                                                                            |
|                                  | Children with DGBIs can be clinically challenging                                   | ...these kids' quality of life can be pretty bad... not having a tangible cause can take time to find a management plan that works... <b>(G02)</b>                                                                                                                                                                                                                                   |

474 **References**

475

- 476 1. Calvano C, Warschburger P. Chronic Abdominal Pain in Children and Adolescents: Parental  
477 Threat Perception Plays a Major Role in Seeking Medical Consultations. *Pain research &*  
478 *management* 2016;2016:1-10.
- 479 2. Warschburger P, Hänig J, Friedt M, et al. Health-related quality of life in children with  
480 abdominal pain due to functional or organic gastrointestinal disorders. *Journal of Pediatric*  
481 *Psychology* 2014;39:45-54.
- 482 3. Park R, Mikami S, LeClair J, et al. Inpatient burden of childhood functional GI disorders in the  
483 USA: an analysis of national trends in the USA from 1997 to 2009. *Neurogastroenterology &*  
484 *Motility* 2015;27:684-692.
- 485 4. Robin SG, Keller C, Zwiener R, et al. Prevalence of Pediatric Functional Gastrointestinal  
486 Disorders Utilizing the Rome IV Criteria. *The Journal of Pediatrics* 2018;195:134-139.
- 487 5. Ansems SM, Ganzevoort IN, van Tol DG, et al. Qualitative study evaluating the expectations  
488 and experiences of Dutch parents of children with chronic gastrointestinal symptoms visiting  
489 their general practitioner. *BMJ open* 2023;13:e069429-e069429.
- 490 6. de Jesus CDF, de Assis Carvalho M, Machado NC. Impaired Health-Related Quality of Life in  
491 Brazilian Children with Chronic Abdominal Pain: A Cross-Sectional Study. *Pediatric*  
492 *gastroenterology, hepatology & nutrition* 2022;25:500-509.
- 493 7. Rajindrajith S, Zeevenhooven J, Devanarayana NM, et al. Functional abdominal pain disorders  
494 in children. *Expert Review of Gastroenterology & Hepatology* 2018;12:369-390.
- 495 8. Robbertz AS, Shneider C, Cohen LL, et al. Sleep Problems in Pediatric Disorders of Gut–Brain  
496 Interaction: A Systematic Review. *Journal of pediatric psychology* 2023;48:778-786.
- 497 9. Kim HJ. Importance of sleep quality in functional abdominal pain disorder in pediatric  
498 patients. *Sleep and biological rhythms* 2022;20:81-85.
- 499 10. Lewis ML, Palsson OS, Whitehead WE, et al. Prevalence of Functional Gastrointestinal  
500 Disorders in Children and Adolescents. *The Journal of Pediatrics* 2016;177:39-43.e3.
- 501 11. Brun R, Kuo B. Review: Functional dyspepsia. *Therapeutic Advances in Gastroenterology*  
502 2010;3:145-164.
- 503 12. Vernon-Roberts A, Alexander I, Day AS. Prevalence of Functional Gastrointestinal Disorders  
504 (Rome IV Criteria) among a Cohort of New Zealand Children. *Gastrointestinal Disorders*  
505 2023;5:261-272.
- 506 13. Jones MP, Koloski NA, Walker MM, et al. A Minority of Childhood Disorders of Gut-Brain  
507 Interaction Persist Into Adulthood: A Risk-Factor Analysis. *Official journal of the American*  
508 *College of Gastroenterology | ACG* 2024;10.14309/ajg.0000000000002751.
- 509 14. Feingold JH, Drossman DA. Deconstructing stigma as a barrier to treating DGBI: Lessons for  
510 clinicians. *Neurogastroenterology and motility* 2021;33:e14080-n/a.
- 511 15. Garr K. The impact of pediatric disorders of gut-brain interaction on the family: the roles of  
512 mental health and somatic symptoms. Department of Psychology. Volume Doctor of  
513 Philosophy: University of Cincinnati, 2022.
- 514 16. Calvano C, Warschburger P. Quality of life among parents seeking treatment for their child's  
515 functional abdominal pain. *Quality of Life Research* 2018;27:2557-2570.
- 516 17. Drossman DA. Functional Gastrointestinal Disorders: History, Pathophysiology, Clinical  
517 Features, and Rome IV. *Gastroenterology* 2016;150:1262-1279.e2.
- 518 18. Quitadamo P, Urbonas V, Papadopoulou A, et al. Do Pediatricians Apply the 2009  
519 NASPGHAN–ESPGHAN Guidelines for the Diagnosis and Management of Gastroesophageal  
520 Reflux After Being Trained? *Journal of pediatric gastroenterology and nutrition* 2014;59:356-  
521 359.
- 522 19. Vieira SCF, Gurgel FM, Leão MZ, et al. Survey on the Adherence to the 2009 NASPGHAN-  
523 ESPGHAN Gastroesophageal Reflux Guidelines by Brazilian Paediatricians. *Journal of pediatric*  
524 *gastroenterology and nutrition* 2018;67:e1-e5.

- 525 20. Waheed A, Malone M, Samiullah S. Functional Gastrointestinal Disorders: Functional  
526 Gastrointestinal Disorders in Children. *FP Essentials* 2018;466:29-35.
- 527 21. Breen M, Murphy KP, O'Neill SB, et al. The utilisation and diagnostic yield of radiological  
528 imaging in a specialist functional GI disorder clinic: an 11-year retrospective study. *European*  
529 *radiology* 2014;24:3097-3104.
- 530 22. Vernon-Roberts A, Alexander I, Day AS. Systematic Review of Pediatric Functional  
531 Gastrointestinal Disorders (Rome IV Criteria). *J Clin Med* 2021;10.
- 532 23. Velasco C, Collazos-Saa L, García-Perdomo H. A systematic review and meta-analysis in  
533 schoolchildren and adolescents with functional gastrointestinal disorders according to rome  
534 iv criteria. *Arquivos de Gastroenterologia* 2022;59:304-313.
- 535 24. O'Brien BC, Harris IB, Beckman TJ, et al. Standards for Reporting Qualitative Research: A  
536 Synthesis of Recommendations. *Academic Medicine* 2014;89.
- 537 25. Douglas Drossman, Lin Chang, William Chey, et al. *Rome IV Pediatric Functional*  
538 *Gastrointestinal Disorders – Disorders of Gut-Brain Interaction, First Edition* Raleigh, North  
539 Carolina: Rome Foundation, 2016.
- 540 26. Thomas D. A General Inductive Approach for Analyzing Qualitative Evaluation Data. *American*  
541 *Journal of Evaluation* 2006;27:237-246.
- 542 27. Jia M, Lu P, Khoo J, et al. Delay in diagnosis is associated with decreased treatment  
543 effectiveness in children with rumination syndrome. *Journal of pediatric gastroenterology and*  
544 *nutrition* 2024.
- 545 28. Biernikiewicz M, Germain N, Toumi M. Second opinions, multiple physician appointments,  
546 and overlapping prescriptions in the paediatric population: A systematic literature review.  
547 *Journal of evaluation in clinical practice* 2020;26:1761-1767.
- 548 29. Gamboa HE, Sood MR. *The Spectrum of Functional GI Disorders*. Cham: Springer International  
549 Publishing, 2021:255-264.
- 550 30. Macpherson AK, Kramer MS, Ducharme FM, et al. Doctor shopping before and after a visit to  
551 a paediatric emergency department. *Paediatr Child Health* 2001;6:341-6.
- 552 31. Drossman DA, Chang L, Deutsch JK, et al. A Review of the Evidence and Recommendations on  
553 Communication Skills and the Patient - Provider Relationship: A Rome Foundation Working  
554 Team Report. *Gastroenterology* 2021;161:1670-1688.e7.
- 555 32. Sansone R, Sansone L. Doctor Shopping: A Phenomenon of Many Themes. *Innovations in*  
556 *clinical neuroscience* 2012;9:42-46.
- 557 33. Vernon-Roberts A, Safe M, Day AS. Editorial: Pediatric Functional Gastrointestinal Disorders:  
558 Challenges in Diagnosis and Treatment. *Gastrointestinal Disorders* 2024;6:308-312.
- 559 34. Daly M, Zarate-Lopez N. Functional gastrointestinal disorders: History taking skills in practice.  
560 *Clinical Medicine* 2021;21:e480-e486.
- 561 35. Brekke M, Brodwall A. Understanding parents' experiences of disease course and influencing  
562 factors: a 3-year follow-up qualitative study among parents of children with functional  
563 abdominal pain. *BMJ Open* 2020;10:e037288.
- 564 36. Brodwall A, Brekke M. General practitioners' experiences with children and adolescents with  
565 functional gastrointestinal disorders: a qualitative study in Norway. *Scand J Prim Health Care*  
566 2021;39:543-551.
- 567 37. Tome J, Kamboj AK, Loftus CG. Approach to Disorders of Gut-Brain Interaction. *Mayo Clinic*  
568 *Proceedings* 2023;98:458-467.
- 569 38. Hale AE, Smith AM, Christiana JS, et al. Perceptions of Pain Treatment in Pediatric Patients  
570 With Functional Gastrointestinal Disorders. *The Clinical journal of pain* 2020;36:550-557.
- 571 39. Burgell RE, Hoey L, Norton K, et al. Treating disorders of brain-gut interaction with  
572 multidisciplinary integrated care. Moving towards a new standard of care. *JGH Open*  
573 2024;8:e13072.

- 574 40. Beinvoogl B, Burch E, Snyder J, et al. Multidisciplinary Treatment Reduces Pain and  
575 Increases Function in Children With Functional Gastrointestinal Disorders. *Clinical*  
576 *gastroenterology and hepatology* 2019;17:994-996.
- 577 41. Wehi P, Roa T. Reciprocal relationships: identity, tradition and food in the Kīngitanga Poukai  
578 He Manaakitanga: o te tuakiri, o te tikanga me te kai ki te Poukai o te Kīngitanga. .  
579 <https://doi.org/10.31235/osf.io/tz746>. SocArXiv Preprint 2019.  
580

581 **Table 4.** Standards for Reporting Qualitative Research (SRQR)

|                                                                                                                                                                                                                                                                                                                                                                                                      | Page/line no(s).   |
|------------------------------------------------------------------------------------------------------------------------------------------------------------------------------------------------------------------------------------------------------------------------------------------------------------------------------------------------------------------------------------------------------|--------------------|
| <b>Title and abstract</b>                                                                                                                                                                                                                                                                                                                                                                            |                    |
| <b>Title</b> - Concise description of the nature and topic of the study Identifying the study as qualitative or indicating the approach (e.g., ethnography, grounded theory) or data collection methods (e.g., interview, focus group) is recommended.                                                                                                                                               | P1.<br>L1-3        |
| <b>Abstract</b> - Summary of key elements of the study using the abstract format of the intended publication; typically includes background, purpose, methods, results, and conclusions                                                                                                                                                                                                              | p.3<br>L.55-80     |
| <b>Introduction</b>                                                                                                                                                                                                                                                                                                                                                                                  |                    |
| <b>Problem formulation</b> - Description and significance of the problem/phenomenon studied; review of relevant theory and empirical work; problem statement                                                                                                                                                                                                                                         | p. 4<br>L. 83-107  |
| <b>Purpose or research question</b> - Purpose of the study and specific objectives or questions                                                                                                                                                                                                                                                                                                      | p. 5<br>L108-111   |
| <b>Methods</b>                                                                                                                                                                                                                                                                                                                                                                                       |                    |
| <b>Qualitative approach and research paradigm</b> - Qualitative approach (e.g., ethnography, grounded theory, case study, phenomenology, narrative research) and guiding theory if appropriate; identifying the research paradigm (e.g., postpositivist, constructivist/ interpretivist) is also recommended; rationale                                                                              | p. 5<br>L. 114-118 |
| <b>Researcher characteristics and reflexivity</b> - Researchers' characteristics that may influence the research, including personal attributes, qualifications/experience, relationship with participants, assumptions, and/or presuppositions; potential or actual interaction between researchers' characteristics and the research questions, approach, methods, results, and/or transferability | p. 5<br>L. 147-148 |
| <b>Context</b> - Setting/site and salient contextual factors; rationale                                                                                                                                                                                                                                                                                                                              | p. 5<br>L.119-146  |
| <b>Sampling strategy</b> - How and why research participants, documents, or events were selected; criteria for deciding when no further sampling was necessary (e.g., sampling saturation); rationale                                                                                                                                                                                                | p. 6<br>L. 145     |
| <b>Ethical issues pertaining to human subjects</b> - Documentation of approval by an appropriate ethics review board and participant consent, or explanation for lack thereof; other confidentiality and data security issues                                                                                                                                                                        | p. 5<br>L116-118   |
| <b>Data collection methods</b> - Types of data collected; details of data collection procedures including (as appropriate) start and stop dates of data collection and analysis, iterative process, triangulation of sources/methods, and modification of procedures in response to evolving study findings; rationale                                                                               | p. 6<br>L.136-146  |

|                                                                                                                                                                                                                                                       |                    |
|-------------------------------------------------------------------------------------------------------------------------------------------------------------------------------------------------------------------------------------------------------|--------------------|
| <b>Data collection instruments and technologies</b> - Description of instruments (e.g., interview guides, questionnaires) and devices (e.g., audio recorders) used for data collection; if/how the instrument(s) changed over the course of the study | p. 6<br>L. 143-146 |
| <b>Units of study</b> - Number and relevant characteristics of participants, documents, or events included in the study; level of participation (could be reported in results)                                                                        | p. 5<br>L. 120-135 |
| <b>Data processing</b> - Methods for processing data prior to and during analysis, including transcription, data entry, data management and security, verification of data integrity, data coding, and anonymization/de-identification of excerpts    | p. 6<br>L. 143-146 |
| <b>Data analysis</b> - Process by which inferences, themes, etc., were identified and developed, including the researchers involved in data analysis; usually references a specific paradigm or approach; rationale                                   | p. 6<br>L. 120-153 |
| <b>Techniques to enhance trustworthiness</b> - Techniques to enhance trustworthiness and credibility of data analysis (e.g., member checking, audit trail, triangulation); rationale                                                                  | p. 6<br>L. 120-153 |

### Results/findings

|                                                                                                                                                                                                      |                    |
|------------------------------------------------------------------------------------------------------------------------------------------------------------------------------------------------------|--------------------|
| <b>Synthesis and interpretation</b> - Main findings (e.g., interpretations, inferences, and themes); might include the development of a theory or model or integration with prior research or theory | p. 6<br>L. 154-397 |
| <b>Links to empirical data</b> - Evidence (e.g., quotes, field notes, text excerpts, photographs) to substantiate analytic findings                                                                  | p. 20-24           |

### Discussion

|                                                                                                                                                                                                                                                                                                                                                                                                                 |                     |
|-----------------------------------------------------------------------------------------------------------------------------------------------------------------------------------------------------------------------------------------------------------------------------------------------------------------------------------------------------------------------------------------------------------------|---------------------|
| <b>Integration with prior work, implications, transferability, and contribution(s) to the field</b> - Short summary of main findings; explanation of how findings and conclusions connect to, support, elaborate on, or challenge conclusions of earlier scholarship; discussion of the scope of application/generalizability; identification of unique contribution(s) to scholarship in a discipline or field | p. 16<br>L. 399-445 |
| <b>Limitations</b> - Trustworthiness and limitations of findings                                                                                                                                                                                                                                                                                                                                                | p. 18<br>L.446-454  |

### Other

|                                                                                                                                               |                  |
|-----------------------------------------------------------------------------------------------------------------------------------------------|------------------|
| <b>Conflicts of interest</b> - Potential sources of influence or perceived influence on study conduct and conclusions; how these were managed | p. 1<br>L. 35-37 |
| <b>Funding</b> - Sources of funding and other support; role of funders in data collection, interpretation, and reporting                      | p. 1<br>L. 35-37 |
